# Supplementary material for: Fetal and maternal morbidity in pregnant patients with Lupus: a 10-year US nationwide analysis
Source: HighWire-hosted journal article supplement (doi:10.1136/rmdopen-2022-002752), 2023-02-01
Supplement: rmdopen-2022-002752supp001_data_supplement.pdf [file rmdopen-2022-002752supp001_data_supplement.pdf]

**Supplemental Table 1. Diagnosis and procedure codes used to define 21 indicators of maternal and fetal morbidity as specified by the Centers for Disease Control and Prevention**

| Severe maternal morbidity indicator              | ICD-9-CM code                                                                  | ICD-10-CM code                                                                                                                                                                                        |
|--------------------------------------------------|--------------------------------------------------------------------------------|-------------------------------------------------------------------------------------------------------------------------------------------------------------------------------------------------------|
| Acute myocardial infarction                      | 410.xx                                                                         | I21x, I22x                                                                                                                                                                                            |
| Aneurysm                                         | 441.xx                                                                         | I71x, I790                                                                                                                                                                                            |
| Acute renal failure                              | 584.5, 584.6, 584.7, 584.8, 584.9, 669.3x                                      | N17x, O904                                                                                                                                                                                            |
| Adult respiratory distress syndrome              | 518.5x, 518.81 518.82 518.84, 799.1                                            | J80, J951, J952, J953, J9582x, J962x, R092                                                                                                                                                            |
| Amniotic fluid embolism                          | 673.1x                                                                         | O881x                                                                                                                                                                                                 |
| Cardiac arrest/ventricular fibrillation          | 427.41, 427.42, 427.5                                                          | I490x, I46x                                                                                                                                                                                           |
| Disseminated intravascular coagulation           | 286.6, 286.9, 666.3x                                                           | D65, D688, D689, O723                                                                                                                                                                                 |
| Eclampsia                                        | 642.6x                                                                         | O159, O150x, O151, O152                                                                                                                                                                               |
| Heart failure/arrest during surgery or procedure | 997.1                                                                          | I9712x, I9613x                                                                                                                                                                                        |
| Pre-term delivery                                |                                                                                |                                                                                                                                                                                                       |
| Puerperal cerebrovascular disorders              | 430.xx, 431.xx, 432.xx, 433.xx, 434.xx, 436.xx, 437.xx, 671.5x, 674.0x, 997.02 | I60xx-I68xx, O2250, O2251, O2252, O2253, I9781x, I9782x, O873, G08, G43601, G43609, G43611, G43619, G439, G43901, G43909, G43911, G43919, G931, G9340, G9341, G9349, G936, P110, S061, I97811, I97821 |
| Pulmonary edema/Acute heart failure              | 518.4, 428.1, 428.0, 428. 21, 428.23, 428.31, 428.33, 428.41, 428.43           | J810, I501, I5020, I5021, I5023, I5030, I5031, I5033, I5040, I5041, I5043, I509                                                                                                                       |
| Severe anesthesia complications                  | 668.0x, 668.1x, 668.2x                                                         | O740, O741, O742, O743, O890x, O891, O892                                                                                                                                                             |
| Sepsis                                           | 038.xx, 995.91, 995.92, 670.2x                                                 | A40x, A41x, A327, R6520, O85, T80211A, T814XXA                                                                                                                                                        |
| Shock                                            | 669.1x, 785.5x, 995.0, 995.4, 998.0x                                           | O751, R57x, R6521, T782XXA, T882XXA, T886XXA, T8110XA, T8111XA, T8119XA                                                                                                                               |
| Sickle cell disease with crisis                  | 282.42, 282.62, 282.64, 282.69                                                 | D5741x, D570x, D5721x, D5781x                                                                                                                                                                         |
| Air and thrombotic embolism                      | 415.1x, 673.0x, 673.2x, 673.3x, 673.8x                                         | 126.x, O88.0x, O88.2x, O88.3x, O88.8x                                                                                                                                                                 |
| Blood transfusion                                | 99.0x                                                                          | 30233H0, 30233N0, 30243H0, 30243N0, 30253H0, 30253N0, 30263H0, 30263N0, 30233H1, 30233N1, 30243H1, 30243N1, 30253H1, 30253N1, 30263H1, 30263N1                                                        |
| Conversion of cardiac rhythm                     | 99.6x                                                                          | 5A12012, 5A2204Z                                                                                                                                                                                      |

|                                         |                                   |                                             |
|-----------------------------------------|-----------------------------------|---------------------------------------------|
| <b>Hysterectomy</b>                     | 68.3x-68.9x                       | OUT90ZZ, OUT94ZZ, OUT97ZZ, OUT98ZZ, OUT9FZZ |
| <b>Temporary tracheostomy</b>           | 31.1                              | OB110F, OB110Z, OB113, OB114                |
| <b>Ventilation</b>                      | 93.90, 96.01, 96.02, 96.03, 96.05 | 5A1935Z, 5A1945Z, 5A1955Z                   |
| <b>Severe fetal morbidity indicator</b> | <b>ICD-9-CM code</b>              | <b>ICD-10-CM code</b>                       |
| <b>Intrauterine growth restriction</b>  | 764.9                             | O36.5                                       |
| <b>Premature/preterm delivery</b>       | 644                               | O60                                         |

\*ICD 9/10 codes include all the available subcategory codes
